# Supplementary material for: Sustainable next-generation color converters from P. harmala seed extracts for solid-state lighting
Source: Royal Society of Chemistry journal article supplement (doi:10.1039/d4ra01150c), 2024-01-01
Supplement: d4ra01150c1.pdf [file d4ra01150c1.pdf]

# Sustainable Next-generation Color Converters of *P. harmala* Seed Extracts for Solid-State Lighting

Talha Erdem<sup>a,\*</sup>, Ali Orenc<sup>b</sup>, Dilber Akcan<sup>c</sup>, Fatih Duman<sup>b,d</sup>, Zeliha Soran-Erdem<sup>c,e,\*</sup>

<sup>a</sup>Department of Electrical-Electronics Engineering, Abdullah Gül University, Kayseri, Türkiye

<sup>b</sup>Nanotechnology Research Center (ERNAM), Erciyes University, Kayseri, Türkiye

<sup>c</sup>Bioengineering Program, Graduate School of Engineering and Science, Abdullah Gül University, Kayseri, Türkiye

<sup>d</sup>Department of Biology, Erciyes University, Kayseri, Türkiye

<sup>e</sup>Department of Engineering Sciences, Abdullah Gül University, Kayseri, Türkiye

<sup>†</sup>Zeliha Soran Erdem (zeliha.soranerdem@agu.edu.tr) and Talha Erdem (erdem.talha@agu.edu.tr) are co-corresponding authors.

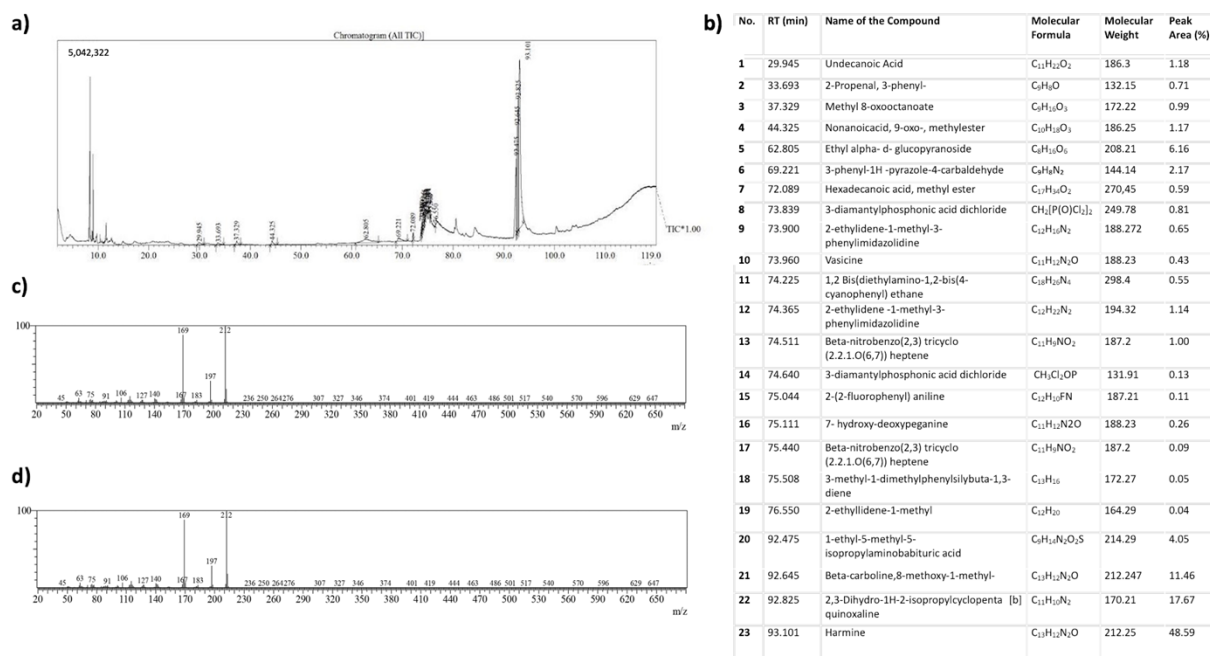

**figure S1.** a) GC-MS chromatogram of aqueous extract of whole plant extract of *P. harmala*, b) Phytochemicals identified in *P. Harmala* seed extract, c,d) Mass spectra of harmine and beta-carboline 8-methoxy -1-methyl identified by GC-MS, respectively.

**F**

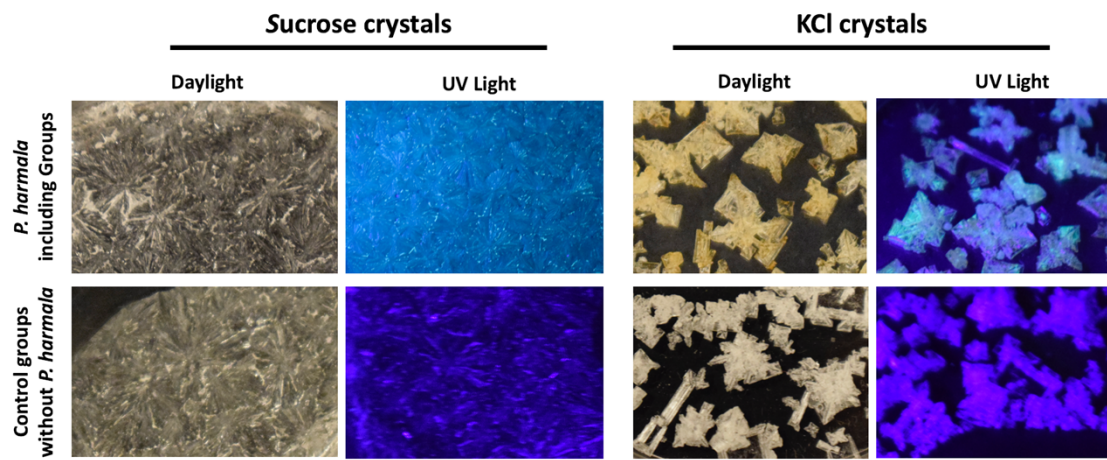

**Figure S2.** Images of sucrose and KCl crystals with and without *P. harmala* extract.

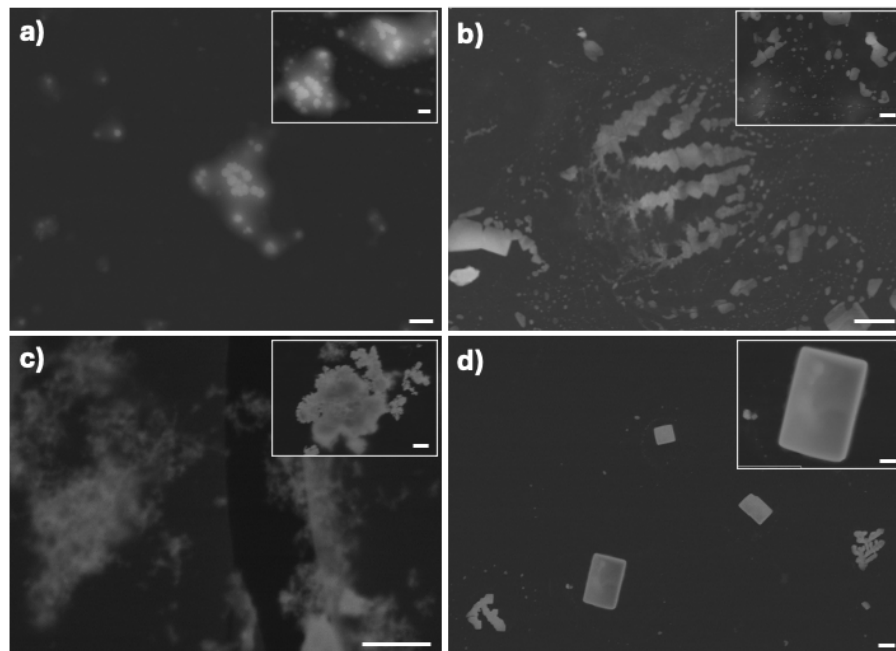

**Figure S3.** STEM images of a) sucrose crystal powders including *Peganum harmala*, b) KCl crystal powders including *Peganum harmala*, c) sucrose crystal powders without *Peganum harmala* extract (sucrose control group), d) KCl crystal powders without *Peganum harmala* extract (KCl control group). Insets represent the magnified images of the respective groups. The scale bars indicate 2  $\mu\text{m}$  for the main images and 1  $\mu\text{m}$  for the insets.

**Table S1.** The average sizes and standard deviations of the crystal powders calculated from STEM images using the Image J program.

| Groups                                           | Average Size      | Standart Deviation |
|--------------------------------------------------|-------------------|--------------------|
| <i>Peganum harmala</i> in sucrose crystal powder | 383 nm            | 142 nm             |
| <i>Peganum harmala</i> in KCl crystal powder     | 345 nm            | 124 nm             |
| Only sucrose crystal powder                      | 324 nm            | 136 nm             |
| Only KCl crystal powder                          | 1.5 $\mu\text{m}$ | 1.8 $\mu\text{m}$  |

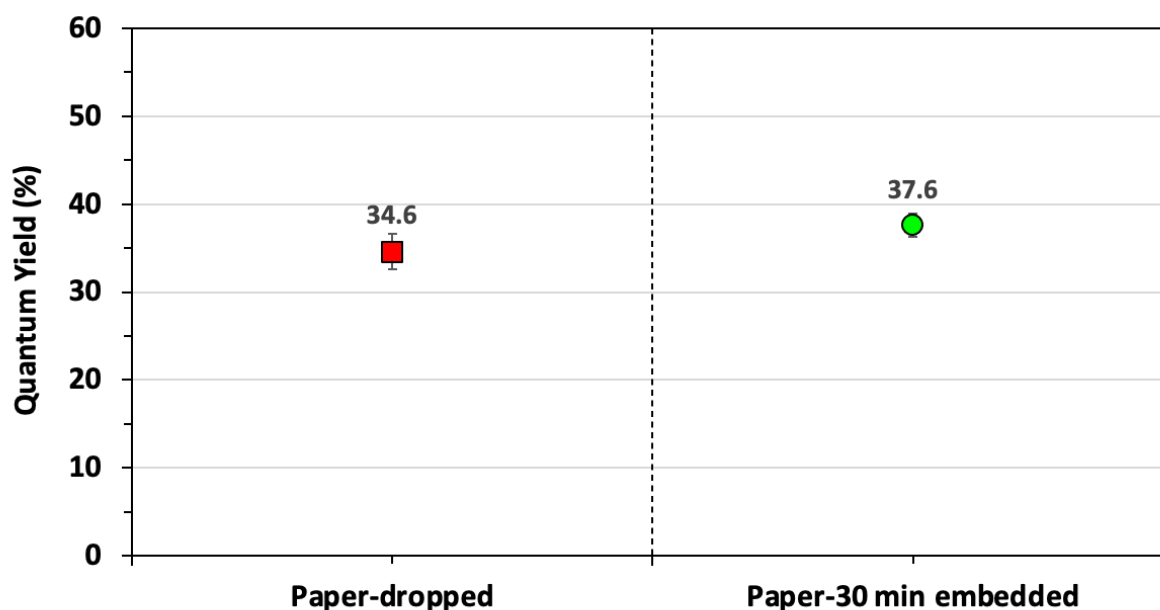

**Figure S4.** Quantum yields of *P. harmala* dropped papers and 30 min embedded papers.
